# Supplementary material for: The immune-related microRNA miR-146b is upregulated in glioblastoma recurrence
Source: PubMed Central journal article supplement (PMC6044384; doi:10.18632/oncotarget.25528), 2018-06-26
Supplement: oncotarget-09-29036-s001.pdf [file oncotarget-09-29036-s001.pdf]

## The immune-related microRNA miR-146b is upregulated in glioblastoma recurrence

### SUPPLEMENTARY MATERIALS

**Supplementary Table 1: Patient, tumor, and treatment characteristics.** See Supplementary\_Table\_1

**Supplementary Table 2: All statistically significant differentially-expressed genes in recurrent GBM.** See Supplementary\_Table\_2

**Supplementary Table 3: GSEA oncologic gene sets enriched in recurrent GBM**

| Gene set  | Description                                       | ES   | NES  | P-value | FDR   |
|-----------|---------------------------------------------------|------|------|---------|-------|
| MEK       | Genes down-regulated by MEK upregulation          | 0.42 | 1.83 | <0.001  | 0.187 |
| KRAS      | Genes down-regulated by Ras upregulation          | 0.49 | 1.64 | 0.026   | 0.242 |
| NOTCH     | Genes up-regulated by Notch down-regulation       | 0.43 | 1.62 | 0.021   | 0.180 |
| SRC       | Genes up-regulated by Src down-regulation         | 0.41 | 1.61 | 0.019   | 0.179 |
| ALK       | Genes down-regulation by ALK down-regulation      | 0.46 | 1.61 | 0.016   | 0.169 |
| RAF       | Genes up-regulated by Raf up-regulation           | 0.45 | 1.61 | 0.021   | 0.157 |
| P53       | Genes down-regulated by P53 down-regulation       | 0.44 | 1.59 | 0.020   | 0.148 |
| AKT       | Genes up-regulated by AKT up-regulation           | 0.42 | 1.57 | 0.026   | 0.156 |
| VEGF      | Genes up-regulated by VEGF up-regulation          | 0.41 | 1.51 | 0.061   | 0.196 |
| WNT       | Genes down-regulated by Wnt up-regulation         | 0.37 | 1.50 | 0.040   | 0.200 |
| CYCLIN D1 | Genes down-regulated by Cyclin D1 down-regulation | 0.36 | 1.50 | 0.031   | 0.195 |
| PTEN      | Genes down-regulated by PTEN down-regulation      | 0.37 | 1.51 | 0.026   | 0.206 |

Abbreviations: ES - enrichment score, NES - normalized enrichment score, FDR - false discovery ratio, GSEA - gene set enrichment analysis.

**Supplementary Table 4: Select miR-146b target gene differential expression from RNA-seq analysis**

| <b>miR-146b target</b> | <b>Ratio (R/P)</b> | <b>p-value</b> | <b>Known function</b>                                                   |
|------------------------|--------------------|----------------|-------------------------------------------------------------------------|
| SRSF6                  | 0.72               | 0.008          | mRNA splicing, negative regulation of cell death                        |
| NOVA1                  | 0.55               | 0.033          | neuron-specific RNA-binding protein, tumor suppressor in astrocytoma    |
| KCTD15                 | 0.60               | 0.002          | neural crest development                                                |
| HNRNPD/AUF1A           | 0.69               | 0.003          | nuclear ribonucleoprotein, mRNA stability, NF-kB pathway, IL expression |
| SNX22                  | 0.75               | 0.047          | intracellular trafficking, CD4 cell surface expression                  |
| NSI-BP                 | 0.63               | 0.026          | c-Myc transcriptional control                                           |

Ratio R/P refers normalized gene expression value in recurrence divided by normalized gene expression value in the initial tumor. *P*-value calculated using a Student's *T*-test.

**Supplementary Table 5: Cox regression analysis of association of miR-146b with clinical outcomes**

|                          | <b>HR (95% CI)</b>  | <b>p-value</b> |
|--------------------------|---------------------|----------------|
| Time to local recurrence | 1.592 (1.007–2.516) | 0.047          |
| Time to salvage therapy  | 1.684 (1.056–2.686) | 0.028          |
| Time to death            | 1.321 (0.856–2.037) | 0.208          |

HR - hazard ratio, CI - confidence interval.
